# Supplementary material for: Estrogens and Progestins Cooperatively Shift Breast Cancer Cell Metabolism
Source: MDPI journal article supplement (doi:10.3390/cancers14071776), 2022-03-31
Supplement: s1 [file s1]

# Estrogens and progestins cooperatively shift breast cancer cell metabolism

Ashley V. Ward, Shawna B. Matthews, Lynsey M. Fettig, Duncan Riley, Jessica Finlay-Schultz, Kiran V. Paul, Matthew Jackman, Peter Kabos, Paul S. MacLean and Carol A. Sartorius

Supplementary Figure S1

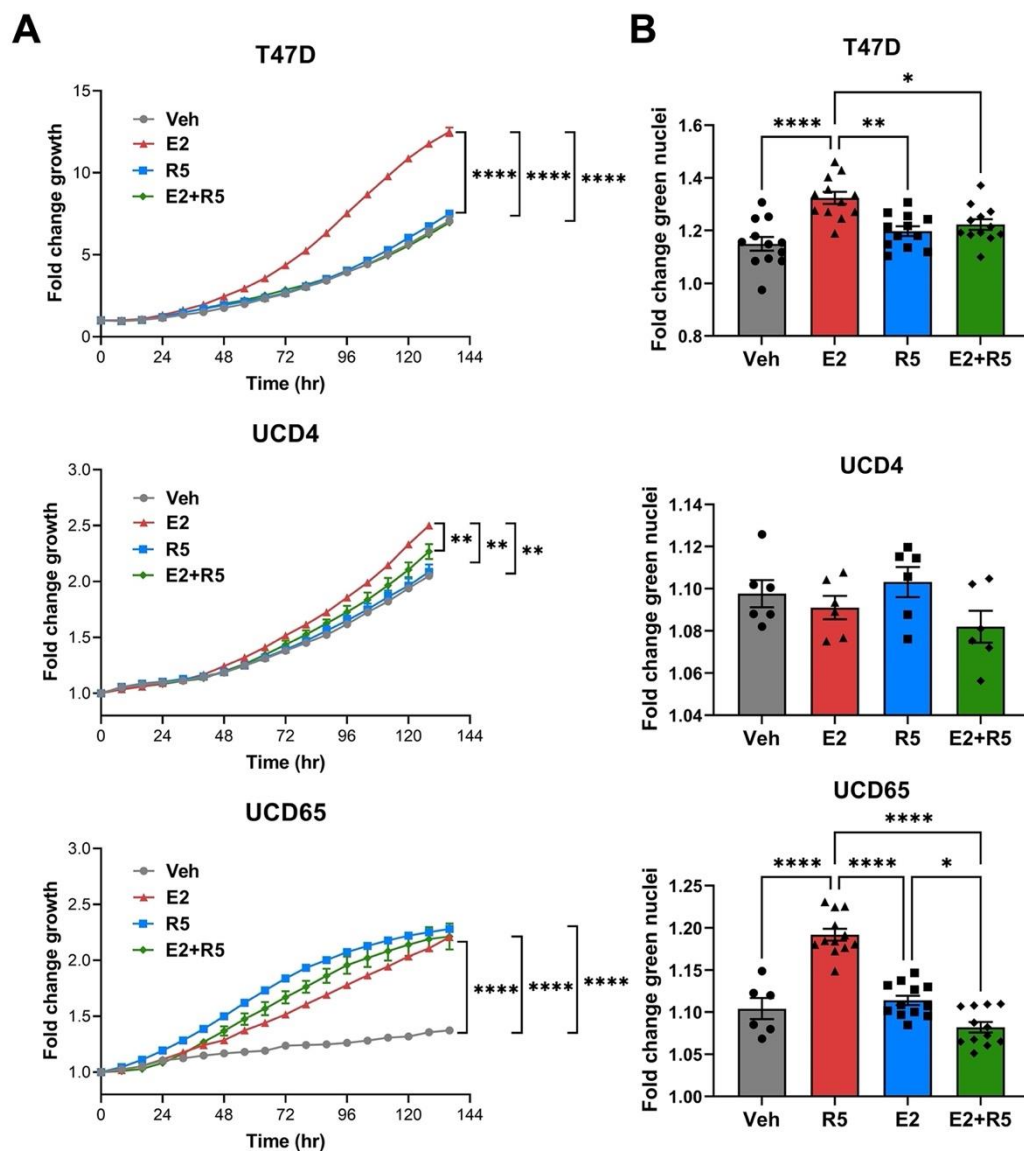

**Figure S1. Proliferation of breast cancer cell lines with hormone treatments.** **A)** T47D, UCD4, and UCD65 cells labeled with nuclear GFP were plated in 96 well plates and treated with Vehicle (Veh), E2 (10 nM), R5020 (R5, 10 nM), or the combination (10 nM each) and monitored for green object counts (cell number) using the Incucyte Live Cell Imaging system (Sartorius). **B)** Cell proliferation plotted at 24 h timepoint. N=6–12 per cell line/hormone condition, mean fold change over vehicle  $\pm$  SEM are indicated. Two-way ANOVA/Tukey multiple comparisons are indicated where  $P < 0.05$ . \*  $p < 0.05$ , \*\*  $p < 0.01$ , \*\*\*\*  $p < 0.0001$  for the indicated comparisons using one-way ANOVA.

Supplementary Figure S2

**A**

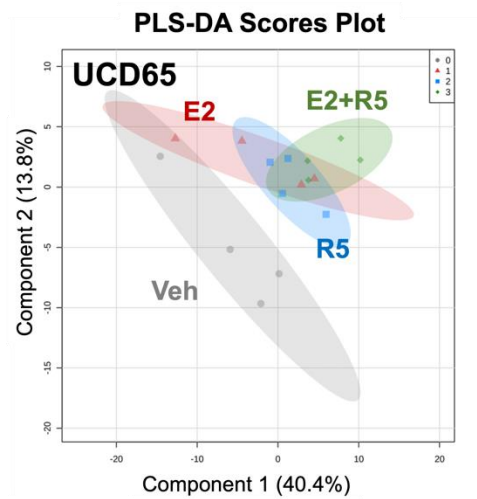

**B**

**Directional Summary of  
UCD4 Global Metabolites**

|                | E2 vs Veh | R5 vs Veh | E2+R5 vs Veh |
|----------------|-----------|-----------|--------------|
| Decreased (↓)  | 37        | 20        | 70           |
| Increased (↑)  | 104       | 121       | 71           |
| Total Detected | 141       | 141       | 141          |

**C**

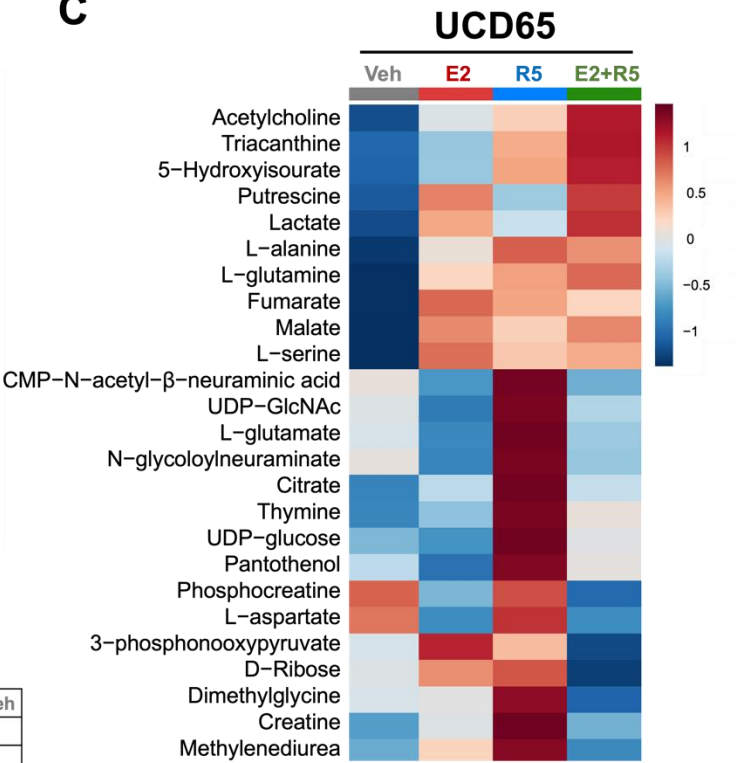

**Figure S2. Steroid hormones increase global metabolites in UCD65 breast cancer cell lines.** Untargeted metabolomics were conducted on UCD65 cells treated with estradiol (E2, 10nM), promegesterone (R5, 10nM), combination (E2+R5, 10nM/10nM), or ethanol (Veh) for 24 h. Data was normalized to total protein per sample, log transformed, and auto-scaled in Metaboanalyst. **A)** Partial Least Squares Discriminant Analysis (PLS-DA) scores plot of total metabolites detected in UCD65 cells with hormone treatment. Shaded regions represent 95% confidence region. **B)** Directional summary of metabolites for UCD65 cell samples within each hormone treatment. Decreased and increased metabolites were determined by a negative or positive fold change value from vehicle samples, respectively. **C)** Heatmap of top 25 metabolites of hormone treated UCD65 cells by ANOVA multiple comparisons. Samples were averaged by treatment (n=4) and Euclidean distance measure and Ward clustering methods were used to generate heatmaps.

# Supplementary Figure S3.

## UCD65

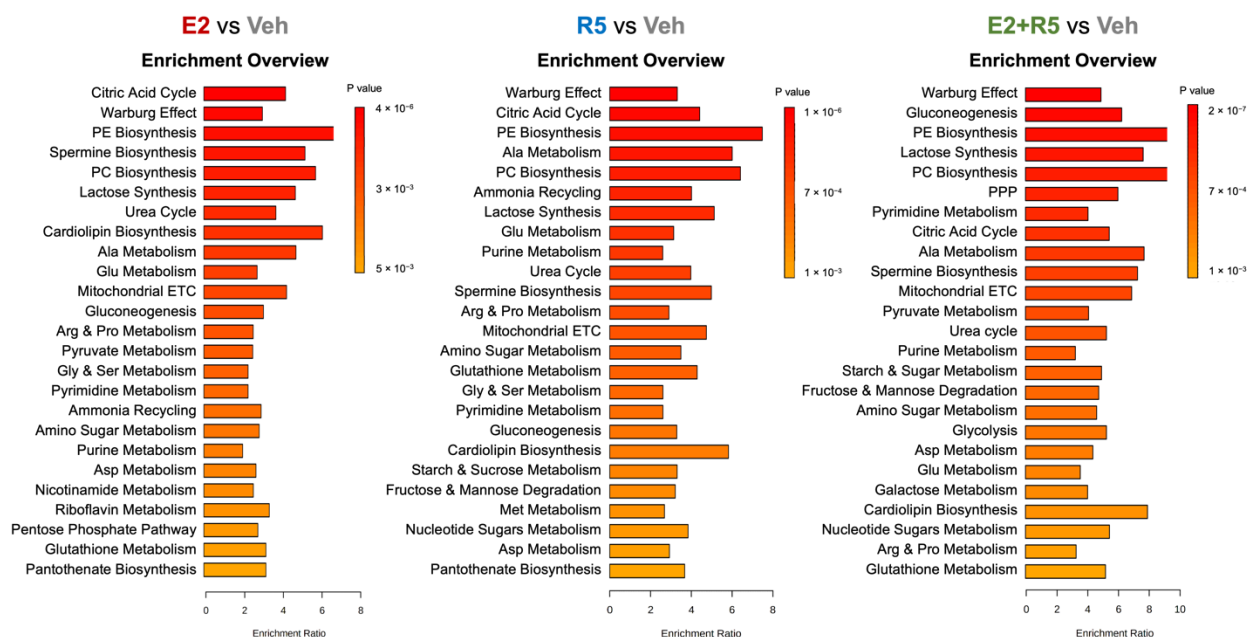

**Figure S3. Metabolite enrichment analysis of UCD65 cells.** Metabolomics samples for each hormone treatment using a positive 1.2-fold change cutoff from vehicle. Bar charts generated using enrichment over representation analysis feature and SMPDB metabolite data base on Metaboanalyst. Enrichment ratio is calculated by Hits / Expected, where hits = observed hits; expected = expected hits.

## Supplementary Figure S4

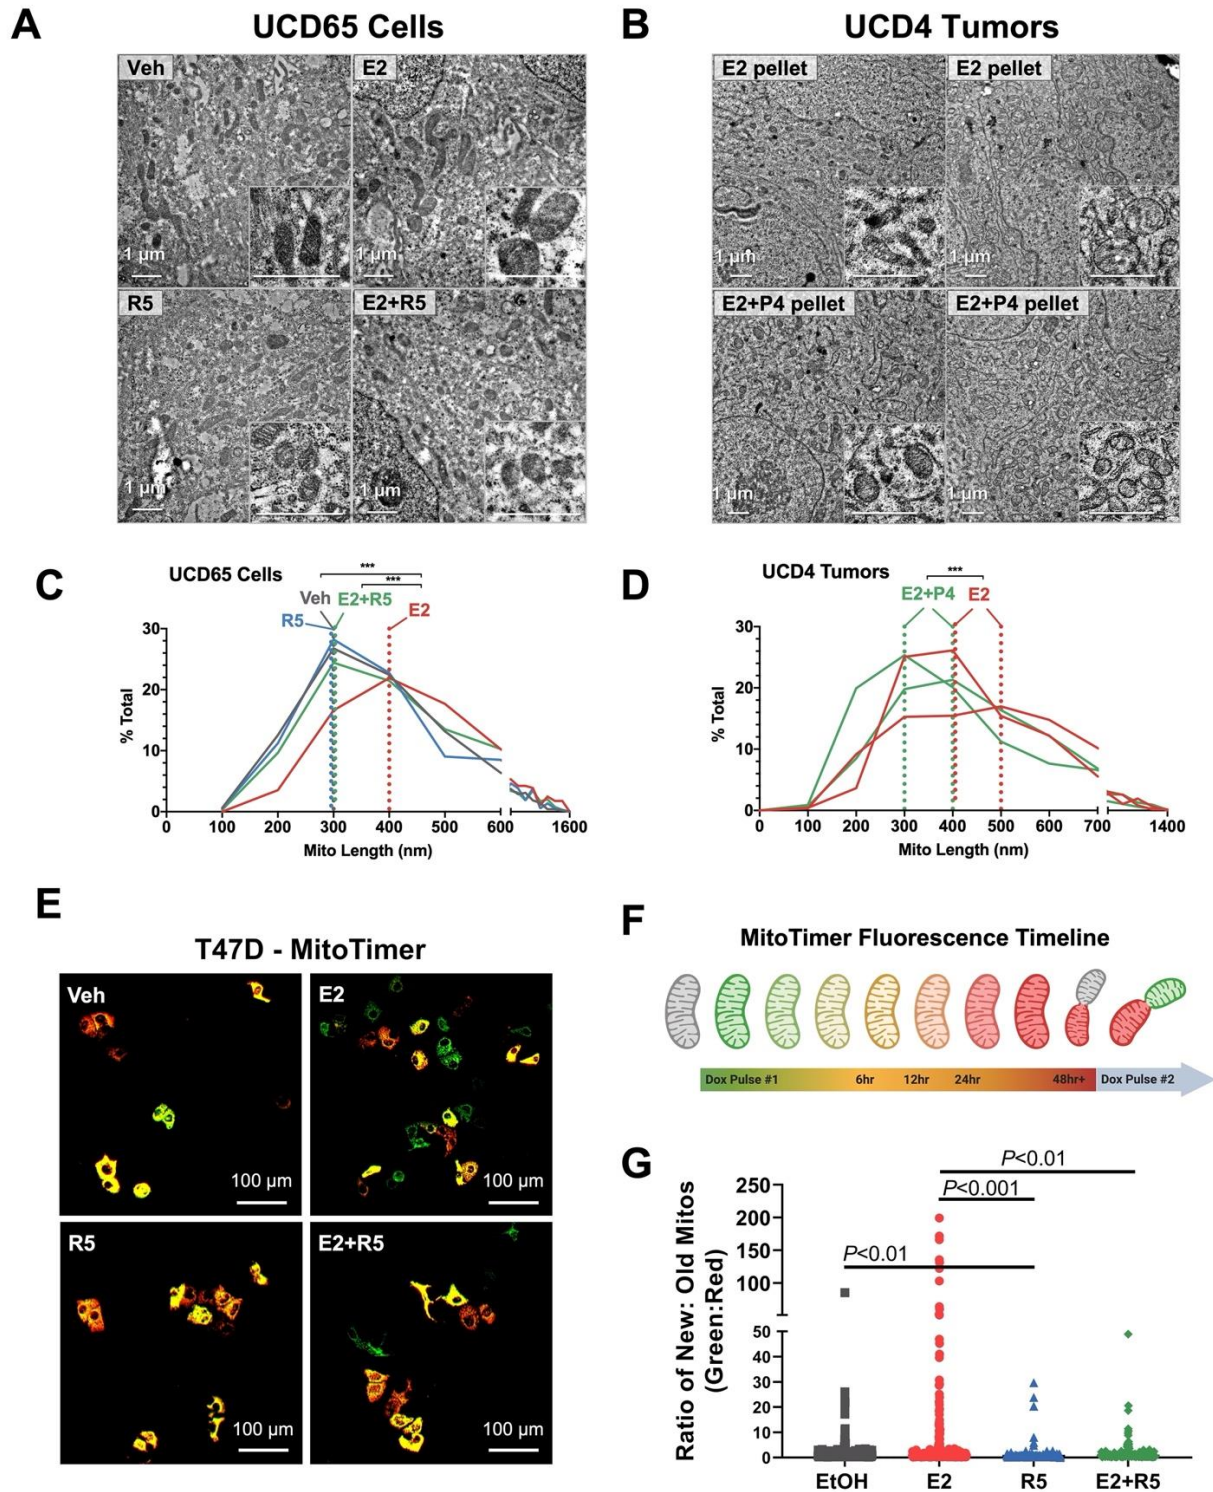

**Figure S4.** Steroid hormones alter mitochondrial morphology and length in UCD65 cells and UCD4 tumors. **A)** Cultured UCD65 cells treated with estradiol (E2, 10nM), promegesterone (R5, 10nM), combination (E2+R5, 10nM/10nM), or ethanol (vehicle) for 24 h were fixed, sectioned, and imaged using transmission electron microscopy. A representative image set is presented for each cell line and treatment (top). **B)** UCD4 xenograft tumors (2) from mice implanted hormone pellets containing E2 alone or E2+P4. A representative image set is presented for each tumor and treatment (top). **C)** Quantitation of mitochondrial length in UCD65 cells was measured along the longest axis in Fiji in >200 mitochondria across 10-14 fields per treatment. Histograms represent mitochondrial length corresponding to 100-nm bins. UCD65 cells, mode: Veh, E2+R5, R5 = 300 nm; E2 = 400 nm. **D)**

Quantitation of mitochondrial length in UCD4 tumors (individual tumors plotted separately) was measured and plotted as in C. UCD4 tumors, mode: E2+P4 tumor 1, 300; E2+P4 tumor 2, E2 tumor 1 = 400 nm; E2 tumor 2 = 500 nm. \* $P < 0.05$ , \*\* $P < 0.01$ , \*\*\* $P < 0.001$  for the indicated comparisons using Kolmogorov-Smirnov test for frequency distributions comparing hormone treatments. E) MitoTimer: Representative fields from laser scanning confocal images taken at 10X magnification on T47D cells stably transduced with the doxycycline-inducible MitoTimer construct. Cells were pulsed with doxycycline for 1 h washed, treated with hormone for 48 h pulsed with Dox again, washout, and a final 24 h hormone treatment. Cells were fixed in 4% paraformaldehyde and imaged on an Olympus BX40 microscope at 10X magnification. F) Schematic of MitoTimer fluorescence over time with Dox pulses. G) Ratios of green to red fluorescent signal are shown and represent mean  $\pm$  SEM of across 10 fields per treatment. Number of cells analyzed were vehicle (243), E2 (305), R5 (240), and E2+R5 (239). Data were log transformed to control for unequal variance, then analyzed by one-way ANOVA.

Supplementary Figure S5

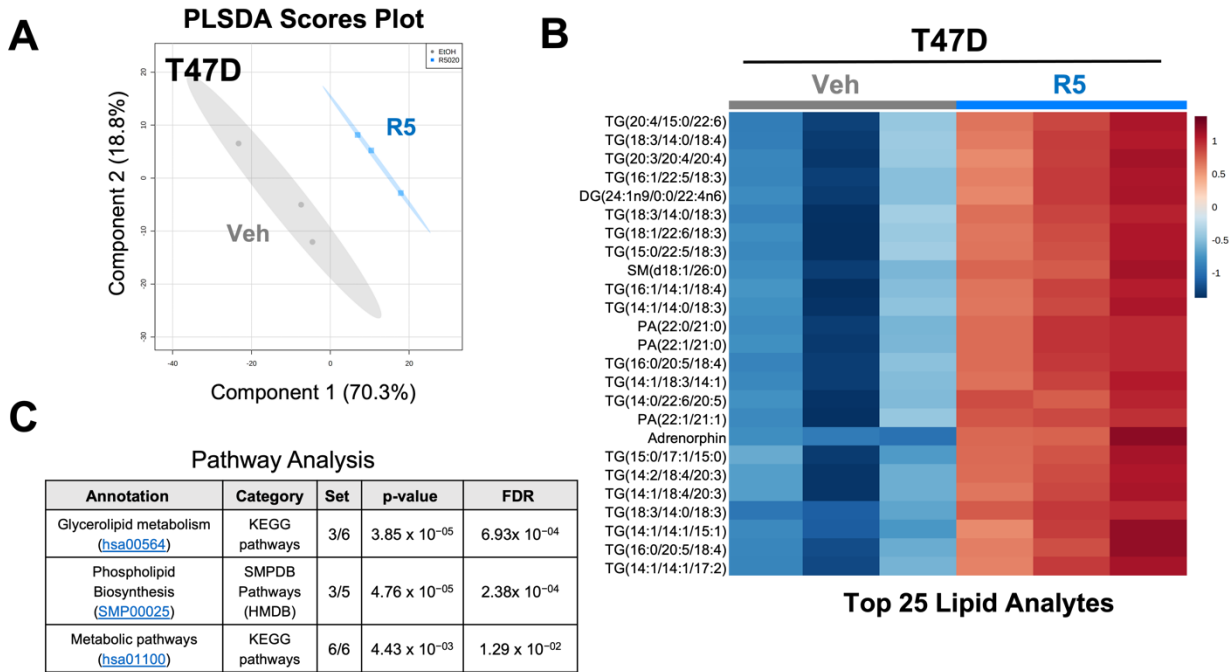

**Figure S5. Progesterin treatment increases total glycerolipids compared to vehicle in T47D cells.** **A)** PLSDA scores plots of T47D lipidomic samples stratified by vehicle or promegesterone (R5, 10nM) treatment 24 h. Shaded areas indicate 95% confidence regions. **B)** Hierarchical clustering heatmaps of top 25 significant lipid analytes in T47D samples. Heatmaps were generated using Euclidean distance measure and Ward clustering method. Lipidomics data was normalized to protein per sample, log transformed, and auto-scaled in Metaboanalyst. **C)** Enrichment analysis of categorical annotations using MBROLE 2.0.



## Supplementary Table S1 - Metabolite Enrichment Tables

**Enrichment Table: T47D – E2 vs Veh**

| Metabolite Set                              | total | expected | hits | Raw p    | Holm p  | FDR     |
|---------------------------------------------|-------|----------|------|----------|---------|---------|
| Pyrimidine Metabolism                       | 59    | 3.17     | 12   | 2.80E-05 | 0.00274 | 0.00274 |
| Purine Metabolism                           | 74    | 3.97     | 13   | 6.46E-05 | 0.00627 | 0.00317 |
| Pyruvate Metabolism                         | 48    | 2.58     | 10   | 0.000118 | 0.0113  | 0.00348 |
| Glutamate Metabolism                        | 49    | 2.63     | 10   | 0.000142 | 0.0135  | 0.00348 |
| Nucleotide Sugars Metabolism                | 20    | 1.07     | 6    | 0.000395 | 0.0371  | 0.00534 |
| Lactose Synthesis                           | 20    | 1.07     | 6    | 0.000395 | 0.0371  | 0.00534 |
| Nicotinate and Nicotinamide Metabolism      | 37    | 1.99     | 8    | 0.000474 | 0.0436  | 0.00534 |
| Glutathione Metabolism                      | 21    | 1.13     | 6    | 0.00053  | 0.0482  | 0.00534 |
| Pentose Phosphate Pathway                   | 29    | 1.56     | 7    | 0.000545 | 0.049   | 0.00534 |
| Urea Cycle                                  | 29    | 1.56     | 7    | 0.000545 | 0.049   | 0.00534 |
| Warburg Effect                              | 58    | 3.12     | 10   | 0.000617 | 0.0543  | 0.0055  |
| Transfer of Acetyl Groups into Mitochondria | 22    | 1.18     | 6    | 0.000699 | 0.0608  | 0.00571 |
| Starch and Sucrose Metabolism               | 31    | 1.67     | 7    | 0.000844 | 0.0726  | 0.00636 |
| Citric Acid Cycle                           | 32    | 1.72     | 7    | 0.00104  | 0.088   | 0.00725 |
| Arginine and Proline Metabolism             | 53    | 2.85     | 9    | 0.00135  | 0.113   | 0.0088  |
| Glycerolipid Metabolism                     | 25    | 1.34     | 6    | 0.00146  | 0.121   | 0.00896 |
| Aspartate Metabolism                        | 35    | 1.88     | 7    | 0.00182  | 0.149   | 0.0101  |
| Cardiolipin Biosynthesis                    | 11    | 0.591    | 4    | 0.00186  | 0.151   | 0.0101  |
| Butyrate Metabolism                         | 19    | 1.02     | 5    | 0.00243  | 0.194   | 0.0113  |
| Mitochondrial Electron Transport Chain      | 19    | 1.02     | 5    | 0.00243  | 0.194   | 0.0113  |
| Ethanol Degradation                         | 19    | 1.02     | 5    | 0.00243  | 0.194   | 0.0113  |
| Glycine and Serine Metabolism               | 59    | 3.17     | 9    | 0.00296  | 0.228   | 0.0127  |
| Galactose Metabolism                        | 38    | 2.04     | 7    | 0.00301  | 0.229   | 0.0127  |
| Threonine and 2-Oxobutanoate Degradation    | 20    | 1.07     | 5    | 0.00311  | 0.233   | 0.0127  |
| Tryptophan Metabolism                       | 60    | 3.22     | 9    | 0.00334  | 0.247   | 0.0131  |

**Enrichment Table: UCD4 – E2 vs Veh**

| Metabolite Set                        | total | expected | hits | Raw p    | Holm p   | FDR      |
|---------------------------------------|-------|----------|------|----------|----------|----------|
| Warburg Effect                        | 58    | 2.15     | 12   | 3.02E-07 | 2.96E-05 | 2.96E-05 |
| Urea Cycle                            | 29    | 1.08     | 7    | 4.72E-05 | 0.00458  | 0.00231  |
| Gluconeogenesis                       | 35    | 1.3      | 7    | 0.000173 | 0.0166   | 0.00564  |
| Glucose-Alanine Cycle                 | 13    | 0.482    | 4    | 0.000909 | 0.0863   | 0.0223   |
| Glycolysis                            | 25    | 0.928    | 5    | 0.00166  | 0.156    | 0.0325   |
| Glycine and Serine Metabolism         | 59    | 2.19     | 7    | 0.00454  | 0.422    | 0.063    |
| Ammonia Recycling                     | 32    | 1.19     | 5    | 0.0052   | 0.478    | 0.063    |
| Citric Acid Cycle                     | 32    | 1.19     | 5    | 0.0052   | 0.478    | 0.063    |
| Carnitine Synthesis                   | 22    | 0.816    | 4    | 0.0073   | 0.657    | 0.063    |
| Transfer of Acetyl Groups into Mito   | 22    | 0.816    | 4    | 0.0073   | 0.657    | 0.063    |
| Glutamate Metabolism                  | 49    | 1.82     | 6    | 0.00752  | 0.662    | 0.063    |
| Aspartate Metabolism                  | 35    | 1.3      | 5    | 0.00772  | 0.672    | 0.063    |
| Arginine and Proline Metabolism       | 53    | 1.97     | 6    | 0.0111   | 0.951    | 0.0833   |
| Phenylalanine and Tyrosine Metabolism | 28    | 1.04     | 4    | 0.0174   | 1        | 0.122    |
| Pentose Phosphate Pathway             | 29    | 1.08     | 4    | 0.0197   | 1        | 0.128    |
| Pyruvate Metabolism                   | 48    | 1.78     | 5    | 0.0286   | 1        | 0.175    |
| Glutathione Metabolism                | 21    | 0.779    | 3    | 0.0395   | 1        | 0.228    |
| Malate-Aspartate Shuttle              | 10    | 0.371    | 2    | 0.05     | 1        | 0.272    |
| Cardiolipin Biosynthesis              | 11    | 0.408    | 2    | 0.0597   | 1        | 0.308    |
| Lysine Degradation                    | 30    | 1.11     | 3    | 0.096    | 1        | 0.47     |
| Tyrosine Metabolism                   | 72    | 2.67     | 5    | 0.122    | 1        | 0.48     |
| Beta-Alanine Metabolism               | 34    | 1.26     | 3    | 0.128    | 1        | 0.48     |
| Alanine Metabolism                    | 17    | 0.631    | 2    | 0.129    | 1        | 0.48     |
| Purine Metabolism                     | 74    | 2.75     | 5    | 0.133    | 1        | 0.48     |
| Methylhistidine Metabolism            | 4     | 0.148    | 1    | 0.141    | 1        | 0.48     |

**Enrichment Table: T47D – R5 vs Veh**

| Metabolite Set                         | total | expected | hits | Raw p    | Holm p  | FDR     |
|----------------------------------------|-------|----------|------|----------|---------|---------|
| Warburg Effect                         | 58    | 2.72     | 11   | 3.29E-05 | 0.00322 | 0.00191 |
| Pyrimidine Metabolism                  | 59    | 2.77     | 11   | 3.90E-05 | 0.00378 | 0.00191 |
| Purine Metabolism                      | 74    | 3.47     | 12   | 7.09E-05 | 0.0068  | 0.00232 |
| Glutathione Metabolism                 | 21    | 0.984    | 6    | 0.000246 | 0.0234  | 0.00602 |
| Starch and Sucrose Metabolism          | 31    | 1.45     | 7    | 0.000355 | 0.0334  | 0.00697 |
| Gluconeogenesis                        | 35    | 1.64     | 7    | 0.000787 | 0.0732  | 0.0128  |
| Pyruvate Metabolism                    | 48    | 2.25     | 8    | 0.00116  | 0.107   | 0.0137  |
| Mitochondrial Electron Transport Chain | 19    | 0.891    | 5    | 0.0013   | 0.118   | 0.0137  |
| Glutamate Metabolism                   | 49    | 2.3      | 8    | 0.00134  | 0.12    | 0.0137  |
| Pentose Phosphate Pathway              | 29    | 1.36     | 6    | 0.00161  | 0.144   | 0.0137  |
| Nucleotide Sugars Metabolism           | 20    | 0.938    | 5    | 0.00167  | 0.147   | 0.0137  |
| Lactose Synthesis                      | 20    | 0.938    | 5    | 0.00167  | 0.147   | 0.0137  |
| Transfer of Acetyl Groups into Mito    | 22    | 1.03     | 5    | 0.00264  | 0.227   | 0.0193  |
| Citric Acid Cycle                      | 32    | 1.5      | 6    | 0.00276  | 0.235   | 0.0193  |
| Aspartate Metabolism                   | 35    | 1.64     | 6    | 0.00444  | 0.373   | 0.0276  |
| Glycerolipid Metabolism                | 25    | 1.17     | 5    | 0.00479  | 0.398   | 0.0276  |
| Glycolysis                             | 25    | 1.17     | 5    | 0.00479  | 0.398   | 0.0276  |
| Nicotinate and Nicotinamide Metabolism | 37    | 1.73     | 6    | 0.00592  | 0.48    | 0.0322  |
| Galactose Metabolism                   | 38    | 1.78     | 6    | 0.00678  | 0.543   | 0.035   |
| Threonine Degradation                  | 20    | 0.938    | 4    | 0.0118   | 0.935   | 0.0545  |
| Glycerol Phosphate Shuttle             | 11    | 0.516    | 3    | 0.0122   | 0.955   | 0.0545  |
| Cardiolipin Biosynthesis               | 11    | 0.516    | 3    | 0.0122   | 0.955   | 0.0545  |
| Pantothenate and CoA Biosynthesis      | 21    | 0.984    | 4    | 0.0141   | 1       | 0.0579  |
| Fructose and Mannose Degradation       | 32    | 1.5      | 5    | 0.0142   | 1       | 0.0579  |
| Phosphatidylethanolamine Biosynthesis  | 12    | 0.562    | 3    | 0.0158   | 1       | 0.0619  |

**Enrichment Table: UCD4 – R5 vs Veh**

| Metabolite Set                         | total | expected | hits | Raw p   | Holm p | FDR   |
|----------------------------------------|-------|----------|------|---------|--------|-------|
| Urea Cycle                             | 29    | 0.34     | 3    | 0.00379 | 0.371  | 0.319 |
| Aspartate Metabolism                   | 35    | 0.41     | 3    | 0.00652 | 0.632  | 0.319 |
| Lactose Synthesis                      | 20    | 0.234    | 2    | 0.0213  | 1      | 0.695 |
| Ammonia Recycling                      | 32    | 0.375    | 2    | 0.0514  | 1      | 1     |
| Phenylacetate Metabolism               | 9     | 0.105    | 1    | 0.101   | 1      | 1     |
| Lactose Degradation                    | 9     | 0.105    | 1    | 0.101   | 1      | 1     |
| Glutamate Metabolism                   | 49    | 0.574    | 2    | 0.109   | 1      | 1     |
| Arginine and Proline Metabolism        | 53    | 0.621    | 2    | 0.125   | 1      | 1     |
| Glucose-Alanine Cycle                  | 13    | 0.152    | 1    | 0.143   | 1      | 1     |
| Warburg Effect                         | 58    | 0.68     | 2    | 0.145   | 1      | 1     |
| Glycine and Serine Metabolism          | 59    | 0.691    | 2    | 0.149   | 1      | 1     |
| Pyrimidine Metabolism                  | 59    | 0.691    | 2    | 0.149   | 1      | 1     |
| Spermidine and Spermine Biosynthesis   | 18    | 0.211    | 1    | 0.193   | 1      | 1     |
| Catecholamine Biosynthesis             | 20    | 0.234    | 1    | 0.212   | 1      | 1     |
| Purine Metabolism                      | 74    | 0.867    | 2    | 0.213   | 1      | 1     |
| Glutathione Metabolism                 | 21    | 0.246    | 1    | 0.221   | 1      | 1     |
| Transfer of Acetyl Groups into Mito    | 22    | 0.258    | 1    | 0.231   | 1      | 1     |
| Glycolysis                             | 25    | 0.293    | 1    | 0.258   | 1      | 1     |
| Amino Sugar Metabolism                 | 33    | 0.387    | 1    | 0.326   | 1      | 1     |
| Gluconeogenesis                        | 35    | 0.41     | 1    | 0.343   | 1      | 1     |
| Nicotinate and Nicotinamide Metabolism | 37    | 0.434    | 1    | 0.359   | 1      | 1     |
| Galactose Metabolism                   | 38    | 0.445    | 1    | 0.366   | 1      | 1     |
| Sphingolipid Metabolism                | 40    | 0.469    | 1    | 0.382   | 1      | 1     |
| Tyrosine Metabolism                    | 72    | 0.844    | 1    | 0.585   | 1      | 1     |

**Enrichment Table: T47D – E2+R5 vs Veh**

| Metabolite Set                         | total | expected | hits | Raw p    | Holm p  | FDR     |
|----------------------------------------|-------|----------|------|----------|---------|---------|
| Purine Metabolism                      | 74    | 5.06     | 15   | 5.67E-05 | 0.00556 | 0.00556 |
| Glutamate Metabolism                   | 49    | 3.35     | 11   | 0.00025  | 0.0242  | 0.00711 |
| Glutathione Metabolism                 | 21    | 1.44     | 7    | 0.000279 | 0.0267  | 0.00711 |
| Warburg Effect                         | 58    | 3.96     | 12   | 0.00029  | 0.0276  | 0.00711 |
| Pentose Phosphate Pathway              | 29    | 1.98     | 8    | 0.00043  | 0.0404  | 0.00843 |
| Starch and Sucrose Metabolism          | 31    | 2.12     | 8    | 0.000707 | 0.0657  | 0.0115  |
| Pyrimidine Metabolism                  | 59    | 4.03     | 11   | 0.00137  | 0.126   | 0.0182  |
| Nucleotide Sugars Metabolism           | 20    | 1.37     | 6    | 0.00149  | 0.135   | 0.0182  |
| Gluconeogenesis                        | 35    | 2.39     | 8    | 0.00169  | 0.152   | 0.0184  |
| Nicotinate and Nicotinamide Metabolism | 37    | 2.53     | 8    | 0.00247  | 0.22    | 0.0243  |
| Pyruvate Metabolism                    | 48    | 3.28     | 9    | 0.00375  | 0.33    | 0.0334  |
| Glycerol Phosphate Shuttle             | 11    | 0.752    | 4    | 0.00459  | 0.399   | 0.0337  |
| Cardiolipin Biosynthesis               | 11    | 0.752    | 4    | 0.00459  | 0.399   | 0.0337  |
| Glycine and Serine Metabolism          | 59    | 4.03     | 10   | 0.00485  | 0.413   | 0.0337  |
| Glycolysis                             | 25    | 1.71     | 6    | 0.00516  | 0.433   | 0.0337  |
| Methionine Metabolism                  | 43    | 2.94     | 8    | 0.00665  | 0.552   | 0.0386  |
| Mitochondrial Electron Transport Chain | 19    | 1.3      | 5    | 0.00708  | 0.581   | 0.0386  |
| Aspartate Metabolism                   | 35    | 2.39     | 7    | 0.0074   | 0.6     | 0.0386  |
| Arginine and Proline Metabolism        | 53    | 3.62     | 9    | 0.00749  | 0.6     | 0.0386  |
| Lactose Synthesis                      | 20    | 1.37     | 5    | 0.00895  | 0.707   | 0.0418  |
| Glucose-Alanine Cycle                  | 13    | 0.889    | 4    | 0.00895  | 0.707   | 0.0418  |
| Urea Cycle                             | 29    | 1.98     | 6    | 0.0111   | 0.856   | 0.0474  |
| Pantothenate and CoA Biosynthesis      | 21    | 1.44     | 5    | 0.0111   | 0.856   | 0.0474  |
| Galactose Metabolism                   | 38    | 2.6      | 7    | 0.0118   | 0.883   | 0.0481  |
| Transfer of Acetyl Groups into Mito    | 22    | 1.5      | 5    | 0.0136   | 1       | 0.0535  |

**Enrichment Table: UCD4 – E2+R5 vs Veh**

| Metabolite Set                      | total | expected | hits | Raw p    | Holm p   | FDR      |
|-------------------------------------|-------|----------|------|----------|----------|----------|
| Warburg Effect                      | 58    | 1.81     | 10   | 3.81E-06 | 0.000373 | 0.000373 |
| Urea Cycle                          | 29    | 0.906    | 5    | 0.0015   | 0.146    | 0.0737   |
| Gluconeogenesis                     | 35    | 1.09     | 5    | 0.0036   | 0.345    | 0.117    |
| Glycolysis                          | 25    | 0.781    | 4    | 0.00627  | 0.596    | 0.154    |
| Amino Sugar Metabolism              | 33    | 1.03     | 4    | 0.017    | 1        | 0.308    |
| Aspartate Metabolism                | 35    | 1.09     | 4    | 0.0208   | 1        | 0.308    |
| Lactose Synthesis                   | 20    | 0.625    | 3    | 0.022    | 1        | 0.308    |
| Transfer of Acetyl Groups into Mito | 22    | 0.688    | 3    | 0.0285   | 1        | 0.349    |
| Pentose Phosphate Pathway           | 29    | 0.906    | 3    | 0.0583   | 1        | 0.584    |
| Glucose-Alanine Cycle               | 13    | 0.406    | 2    | 0.0596   | 1        | 0.584    |
| Ammonia Recycling                   | 32    | 1        | 3    | 0.0743   | 1        | 0.591    |
| Citric Acid Cycle                   | 32    | 1        | 3    | 0.0743   | 1        | 0.591    |
| Arginine and Proline Metabolism     | 53    | 1.66     | 4    | 0.0784   | 1        | 0.591    |
| Pyrimidine Metabolism               | 59    | 1.84     | 4    | 0.107    | 1        | 0.729    |
| Galactose Metabolism                | 38    | 1.19     | 3    | 0.112    | 1        | 0.729    |
| Methylhistidine Metabolism          | 4     | 0.125    | 1    | 0.119    | 1        | 0.731    |
| Nucleotide Sugars Metabolism        | 20    | 0.625    | 2    | 0.127    | 1        | 0.731    |
| Glutathione Metabolism              | 21    | 0.656    | 2    | 0.137    | 1        | 0.749    |
| Carnitine Synthesis                 | 22    | 0.688    | 2    | 0.148    | 1        | 0.765    |
| Pyruvate Metabolism                 | 48    | 1.5      | 3    | 0.186    | 1        | 0.91     |
| Biotin Metabolism                   | 8     | 0.25     | 1    | 0.225    | 1        | 1        |
| Phenylacetate Metabolism            | 9     | 0.281    | 1    | 0.249    | 1        | 1        |
| Lactose Degradation                 | 9     | 0.281    | 1    | 0.249    | 1        | 1        |
| Starch and Sucrose Metabolism       | 31    | 0.969    | 2    | 0.252    | 1        | 1        |
| Glycine and Serine Metabolism       | 59    | 1.84     | 3    | 0.279    | 1        | 1        |

**Table S1. T47D and UCD4 Metabolite Enrichment Tables.** Metabolite Enrichment Analysis for each hormone treatment using a positive 1.2-fold change cutoff from vehicle in T47D and UCD4 cells. Tables generated using enrichment over representation analysis feature and SMPDB metabolite data base on Metaboanalyst. Enrichment ratio is calculated by Hits / Expected, where hits = observed hits; expected = expected hits.

## Supplementary Table S2 - ORA Tables

**ORA Table: T47D – E2 vs Veh**

| ID                                  | GeneRatio | BgRatio  | pvalue   | p.adjust | qvalue   | Count |
|-------------------------------------|-----------|----------|----------|----------|----------|-------|
| HALLMARK_MYC_TARGETS_V1             | 99/758    | 181/3314 | 1.09E-21 | 5.47E-20 | 4.95E-20 | 99    |
| HALLMARK_MYC_TARGETS_V2             | 42/758    | 49/3314  | 8.03E-21 | 2.01E-19 | 1.82E-19 | 42    |
| HALLMARK_ESTROGEN_RESPONSE_EARLY    | 98/758    | 187/3314 | 1.15E-19 | 1.91E-18 | 1.73E-18 | 98    |
| HALLMARK_ESTROGEN_RESPONSE_LATE     | 77/758    | 175/3314 | 1.54E-10 | 1.93E-09 | 1.75E-09 | 77    |
| HALLMARK_UNFOLDED_PROTEIN_RESPONSE  | 34/758    | 102/3314 | 9.28E-03 | 8.52E-02 | 7.71E-02 | 34    |
| HALLMARK_E2F_TARGETS                | 56/758    | 185/3314 | 1.02E-02 | 8.52E-02 | 7.71E-02 | 56    |
| HALLMARK_MTORC1_SIGNALING           | 53/758    | 181/3314 | 2.38E-02 | 0.1699   | 0.1538   | 53    |
| HALLMARK_UV_RESPONSE_UP             | 38/758    | 132/3314 | 6.37E-02 | 0.3981   | 0.3604   | 38    |
| HALLMARK_WNT_BETA_CATENIN_SIGNALING | 12/758    | 37/3314  | 0.1180   | 0.6175   | 0.5590   | 12    |
| HALLMARK_G2M_CHECKPOINT             | 50/758    | 188/3314 | 0.1235   | 0.6175   | 0.5590   | 50    |
| HALLMARK_TNFA_SIGNALING_VIA_NFKB    | 41/758    | 154/3314 | 0.1501   | 0.6395   | 0.5789   | 41    |
| HALLMARK_IL2_STAT5_SIGNALING        | 37/758    | 138/3314 | 0.1535   | 0.6395   | 0.5789   | 37    |
| HALLMARK_ADIPOGENESIS               | 43/758    | 164/3314 | 0.1703   | 0.6549   | 0.5929   | 43    |
| HALLMARK_NOTCH_SIGNALING            | 8/758     | 28/3314  | 0.2999   | 1.0000   | 0.9053   | 8     |
| HALLMARK_P53_PATHWAY                | 18/758    | 92/3314  | 0.813    | 1.000    | 0.905    | 18    |

**ORA Table: UCD4 – E2 vs Veh**

| ID                                         | GeneRatio | BgRatio  | pvalue   | p.adjust | qvalue   | Count |
|--------------------------------------------|-----------|----------|----------|----------|----------|-------|
| HALLMARK_E2F_TARGETS                       | 100/496   | 185/3314 | 6.91E-38 | 3.46E-36 | 2.98E-36 | 100   |
| HALLMARK_G2M_CHECKPOINT                    | 85/496    | 188/3314 | 8.19E-25 | 2.05E-23 | 1.77E-23 | 85    |
| HALLMARK_MYC_TARGETS_V1                    | 76/496    | 181/3314 | 9.12E-20 | 1.52E-18 | 1.31E-18 | 76    |
| HALLMARK_ESTROGEN_RESPONSE_EARLY           | 72/496    | 187/3314 | 3.04E-16 | 3.79E-15 | 3.28E-15 | 72    |
| HALLMARK_ESTROGEN_RESPONSE_LATE            | 56/496    | 175/3314 | 3.90E-09 | 3.90E-08 | 3.36E-08 | 56    |
| HALLMARK_MTORC1_SIGNALING                  | 51/496    | 181/3314 | 1.86E-06 | 1.55E-05 | 1.34E-05 | 51    |
| HALLMARK_MYC_TARGETS_V2                    | 16/496    | 49/3314  | 1.38E-03 | 9.84E-03 | 8.49E-03 | 16    |
| HALLMARK_MITOTIC_SPINDLE                   | 40/496    | 194/3314 | 1.77E-02 | 0.1108   | 9.56E-02 | 40    |
| HALLMARK_UNFOLDED_PROTEIN_RESPONSE         | 23/496    | 102/3314 | 2.50E-02 | 0.1386   | 0.1196   | 23    |
| HALLMARK_UV_RESPONSE_UP                    | 26/496    | 132/3314 | 7.98E-02 | 0.3867   | 0.3338   | 26    |
| HALLMARK_EPITHELIAL_MESENCHYMAL_TRANSITION | 25/496    | 127/3314 | 8.51E-02 | 0.3867   | 0.3338   | 25    |
| HALLMARK_REACTIVE_OXYGEN_SPECIES_PATHWAY   | 8/496     | 39/3314  | 0.2194   | 0.8966   | 0.7739   | 8     |
| HALLMARK_HEDGEHOG_SIGNALING                | 6/496     | 28/3314  | 0.2331   | 0.8966   | 0.7739   | 6     |
| HALLMARK_ANGIOGENESIS                      | 4/496     | 19/3314  | 0.3141   | 1.0000   | 0.8632   | 4     |
| HALLMARK_UV_RESPONSE_DN                    | 15/496    | 121/3314 | 0.8250   | 1        | 0.8632   | 15    |

**ORA Table: T47D – R5 vs Veh**

| ID                                         | GeneRatio | BgRatio  | pvalue   | p.adjust | qvalue   | Count |
|--------------------------------------------|-----------|----------|----------|----------|----------|-------|
| HALLMARK_TNFA_SIGNALING_VIA_NFKB           | 20/144    | 154/3314 | 6.86E-06 | 3.23E-04 | 2.67E-04 | 20    |
| HALLMARK_FATTY_ACID_METABOLISM             | 13/144    | 125/3314 | 2.61E-03 | 6.13E-02 | 5.08E-02 | 13    |
| HALLMARK_ANDROGEN_RESPONSE                 | 10/144    | 88/3314  | 4.31E-03 | 6.75E-02 | 5.59E-02 | 10    |
| HALLMARK_EPITHELIAL_MESENCHYMAL_TRANSITION | 12/144    | 127/3314 | 8.24E-03 | 9.06E-02 | 7.51E-02 | 12    |
| HALLMARK_HYPOXIA                           | 14/144    | 162/3314 | 9.64E-03 | 9.06E-02 | 7.51E-02 | 14    |
| HALLMARK_COAGULATION                       | 8/144     | 74/3314  | 1.39E-02 | 9.39E-02 | 7.78E-02 | 8     |
| HALLMARK_APOPTOSIS                         | 11/144    | 120/3314 | 1.40E-02 | 9.39E-02 | 7.78E-02 | 11    |
| HALLMARK_MYOGENESIS                        | 11/144    | 134/3314 | 2.95E-02 | 0.1590   | 0.1318   | 11    |
| HALLMARK_ESTROGEN_RESPONSE_EARLY           | 14/144    | 187/3314 | 3.04E-02 | 0.1590   | 0.1318   | 14    |
| HALLMARK_ESTROGEN_RESPONSE_LATE            | 13/144    | 175/3314 | 3.85E-02 | 0.1808   | 0.1498   | 13    |
| HALLMARK_IL6_JAK_STAT3_SIGNALING           | 5/144     | 49/3314  | 5.94E-02 | 0.2538   | 0.2104   | 5     |
| HALLMARK_XENOBIOTIC_METABOLISM             | 10/144    | 141/3314 | 8.37E-02 | 0.3140   | 0.2602   | 10    |
| HALLMARK_REACTIVE_OXYGEN_SPECIES_PATHWAY   | 4/144     | 39/3314  | 8.68E-02 | 0.3140   | 0.2602   | 4     |
| HALLMARK_UV_RESPONSE_UP                    | 9/144     | 132/3314 | 0.1176   | 0.3947   | 0.3271   | 9     |
| HALLMARK_IL2_STAT5_SIGNALING               | 7/144     | 138/3314 | 0.3929   | 0.7386   | 0.6121   | 7     |

**ORA Table: UCD4 – R5 vs Veh**

| ID                                         | GeneRatio | BgRatio  | pvalue   | p.adjust | qvalue   | Count |
|--------------------------------------------|-----------|----------|----------|----------|----------|-------|
| HALLMARK_TNFA_SIGNALING_VIA_NFKB           | 24/143    | 154/3314 | 1.77E-08 | 7.98E-07 | 6.91E-07 | 24    |
| HALLMARK_IL2_STAT5_SIGNALING               | 14/143    | 138/3314 | 2.12E-03 | 3.61E-02 | 3.12E-02 | 14    |
| HALLMARK_ESTROGEN_RESPONSE_EARLY           | 17/143    | 187/3314 | 2.41E-03 | 3.61E-02 | 3.12E-02 | 17    |
| HALLMARK_XENOBIOTIC_METABOLISM             | 13/143    | 141/3314 | 6.97E-03 | 7.85E-02 | 6.79E-02 | 13    |
| HALLMARK_HYPOXIA                           | 14/143    | 162/3314 | 9.08E-03 | 8.17E-02 | 7.07E-02 | 14    |
| HALLMARK_ESTROGEN_RESPONSE_LATE            | 14/143    | 175/3314 | 1.72E-02 | 0.1292   | 0.1118   | 14    |
| HALLMARK_P53_PATHWAY                       | 13/143    | 175/3314 | 3.66E-02 | 0.2356   | 0.2039   | 13    |
| HALLMARK_CHOLESTEROL_HOMEOSTASIS           | 6/143     | 62/3314  | 4.91E-02 | 0.2760   | 0.2389   | 6     |
| HALLMARK_MYOGENESIS                        | 10/143    | 134/3314 | 6.14E-02 | 0.3071   | 0.2658   | 10    |
| HALLMARK_UV_RESPONSE_DN                    | 9/143     | 121/3314 | 7.52E-02 | 0.3292   | 0.2849   | 9     |
| HALLMARK_ANDROGEN_RESPONSE                 | 7/143     | 88/3314  | 8.33E-02 | 0.3292   | 0.2849   | 7     |
| HALLMARK_KRAS_SIGNALING_DN                 | 8/143     | 108/3314 | 9.22E-02 | 0.3292   | 0.2849   | 8     |
| HALLMARK_EPITHELIAL_MESENCHYMAL_TRANSITION | 9/143     | 127/3314 | 0.0951   | 0.3292   | 0.2849   | 9     |
| HALLMARK_FATTY_ACID_METABOLISM             | 8/143     | 125/3314 | 0.1694   | 0.5422   | 0.4693   | 8     |
| HALLMARK_KRAS_SIGNALING_UP                 | 5/143     | 115/3314 | 0.5596   | 0.8831   | 0.7643   | 5     |

**ORA Table: T47D – E2+R5 vs Veh**

| ID                                       | GeneRatio | BgRatio  | pvalue   | p.adjust | qvalue   | Count |
|------------------------------------------|-----------|----------|----------|----------|----------|-------|
| HALLMARK_MYC_TARGETS_V1                  | 112/938   | 181/3314 | 3.29E-22 | 1.64E-20 | 1.35E-20 | 112   |
| HALLMARK_MYC_TARGETS_V2                  | 41/938    | 49/3314  | 6.62E-16 | 1.65E-14 | 1.36E-14 | 41    |
| HALLMARK_ESTROGEN_RESPONSE_EARLY         | 95/938    | 187/3314 | 1.88E-11 | 3.13E-10 | 2.57E-10 | 95    |
| HALLMARK_OXIDATIVE_PHOSPHORYLATION       | 78/938    | 165/3314 | 8.63E-08 | 1.08E-06 | 8.86E-07 | 78    |
| HALLMARK_ADIPOGENESIS                    | 73/938    | 164/3314 | 4.06E-06 | 3.40E-05 | 2.80E-05 | 73    |
| HALLMARK_MTORC1_SIGNALING                | 79/938    | 181/3314 | 4.09E-06 | 3.40E-05 | 2.80E-05 | 79    |
| HALLMARK_ESTROGEN_RESPONSE_LATE          | 72/938    | 175/3314 | 1.21E-04 | 8.62E-04 | 7.08E-04 | 72    |
| HALLMARK_REACTIVE_OXYGEN_SPECIES_PATHWAY | 22/938    | 39/3314  | 1.98E-04 | 1.24E-03 | 1.02E-03 | 22    |
| HALLMARK_UNFOLDED_PROTEIN_RESPONSE       | 45/938    | 102/3314 | 3.85E-04 | 2.14E-03 | 1.75E-03 | 45    |
| HALLMARK_FATTY_ACID_METABOLISM           | 48/938    | 125/3314 | 8.26E-03 | 4.13E-02 | 3.39E-02 | 48    |
| HALLMARK_ANDROGEN_RESPONSE               | 33/938    | 88/3314  | 3.68E-02 | 0.1672   | 0.1372   | 33    |
| HALLMARK_APOPTOSIS                       | 40/938    | 120/3314 | 0.1274   | 0.5306   | 0.4357   | 40    |
| HALLMARK_NOTCH_SIGNALING                 | 11/938    | 28/3314  | 0.1397   | 0.5373   | 0.4411   | 11    |
| HALLMARK_TNFA_SIGNALING_VIA_NFKB         | 49/938    | 154/3314 | 0.1835   | 0.6554   | 0.5381   | 49    |
| HALLMARK_ALLOGRAFT_REJECTION             | 18/758    | 92/3314  | 0.8126   | 1.0000   | 0.9053   | 18    |

**ORA Table: UCD4 – E2+R5 vs Veh**

| ID                                         | GeneRatio | BgRatio  | pvalue   | p.adjust | qvalue   | Count |
|--------------------------------------------|-----------|----------|----------|----------|----------|-------|
| HALLMARK_ESTROGEN_RESPONSE_EARLY           | 59/283    | 187/3314 | 6.49E-21 | 3.24E-19 | 2.80E-19 | 59    |
| HALLMARK_HYPOXIA                           | 37/283    | 162/3314 | 9.45E-09 | 2.36E-07 | 2.04E-07 | 37    |
| HALLMARK_ESTROGEN_RESPONSE_LATE            | 37/283    | 175/3314 | 8.50E-08 | 1.23E-06 | 1.06E-06 | 37    |
| HALLMARK_TNFA_SIGNALING_VIA_NFKB           | 34/283    | 154/3314 | 9.85E-08 | 1.23E-06 | 1.06E-06 | 34    |
| HALLMARK_GLYCOLYSIS                        | 27/283    | 169/3314 | 8.58E-04 | 8.58E-03 | 7.41E-03 | 27    |
| HALLMARK_IL2_STAT5_SIGNALING               | 21/283    | 138/3314 | 5.81E-03 | 4.84E-02 | 4.18E-02 | 21    |
| HALLMARK_MYOGENESIS                        | 20/283    | 134/3314 | 8.74E-03 | 6.24E-02 | 5.39E-02 | 20    |
| HALLMARK_EPITHELIAL_MESENCHYMAL_TRANSITION | 18/283    | 127/3314 | 2.08E-02 | 0.1297   | 0.1120   | 18    |
| HALLMARK_UV_RESPONSE_DN                    | 17/283    | 121/3314 | 2.62E-02 | 0.1457   | 0.1257   | 17    |
| HALLMARK_P53_PATHWAY                       | 20/283    | 175/3314 | 0.1057   | 0.5284   | 0.4561   | 20    |
| HALLMARK_APICAL_JUNCTION                   | 18/283    | 157/3314 | 0.1179   | 0.5358   | 0.4625   | 18    |
| HALLMARK_UV_RESPONSE_UP                    | 15/283    | 132/3314 | 0.1523   | 0.5956   | 0.5141   | 15    |
| HALLMARK_CHOLESTEROL_HOMEOSTASIS           | 8/283     | 62/3314  | 0.1549   | 0.5956   | 0.5141   | 8     |
| HALLMARK_NOTCH_SIGNALING                   | 4/283     | 28/3314  | 0.2128   | 0.6997   | 0.6040   | 4     |
| HALLMARK_HEDGEHOG_SIGNALING                | 3/283     | 28/3314  | 0.4328   | 0.8642   | 0.7459   | 3     |

**Table S2. T47D and UCD4 RNA-seq ORA Tables.** Over-representation upregulated pathway analysis (ORA) tables on T47D and UCD4 cells for each hormone treatment compared against vehicle. Tables generated in CU Anschutz Genomics Core Shiny App using the molecular signatures data base (MSigDB) hallmark gene set collection.
